# Supplementary material for: Magnetic–plasmonic Ni@Au core–shell nanoparticle arrays and their SERS properties
Source: PubMed Central journal article supplement (PMC9048804; doi:10.1039/c9ra10354f), 2020-01-14
Supplement: RA-010-C9RA10354F-s001.pdf [file RA-010-C9RA10354F-s001.pdf]

## Supporting Information

### Title:

Magnetic-plasmonic Ni@Au core-shell nanoparticle arrays and their SERS properties

### Author:

Lu Wang<sup>a,c</sup>, Zuobin Wang<sup>a,c\*</sup>, Li Li<sup>a,c\*</sup>, Jingran Zhang<sup>a</sup>, Jinyun Liu<sup>d</sup>, Jing Hu<sup>a</sup>, Xiaomin Wu<sup>a</sup>, Zhankun Weng<sup>a,c</sup>, Xueying Chu<sup>e</sup>, Jinhua Li<sup>e</sup> and Zhongliang Qiao<sup>b\*</sup>

### Affiliation:

<sup>a</sup>International Research Centre for Nano Handling and Manufacturing of China, Changchun University of Science and Technology, Changchun 130022, China

<sup>b</sup>Key Laboratory of Laser Technology and Optoelectronic Functional Materials of Hainan Province, School of Physics and Electronic Engineering, Hainan Normal University, Haikou 571158, China

<sup>c</sup>Ministry of Education Key Laboratory for Cross-Scale Micro and Nano Manufacturing, Changchun University of Science and Technology, Changchun 130022, China

<sup>d</sup>College of Information Engineering, North China University of Science and Technology, Tangshan 063210, China

<sup>e</sup>School of Science, Changchun University of Science and Technology, Changchun 130022, China

**Corresponding author:**

Zuobin Wang: phone: +86 431 85582926, fax: +86 431 85582925, e-mail address:

wangz@cust.edu.cn

Zhongliang Qiao: phone: +86 898 65861468, fax: +86 898-65861468, e-mail address:

qzhl2007@hotmail.com

Li Li: phone: phone: +86 431 85582926, fax: +86 431 85582925, e-mail address:

lil@cuz.edu.cn

## Figures

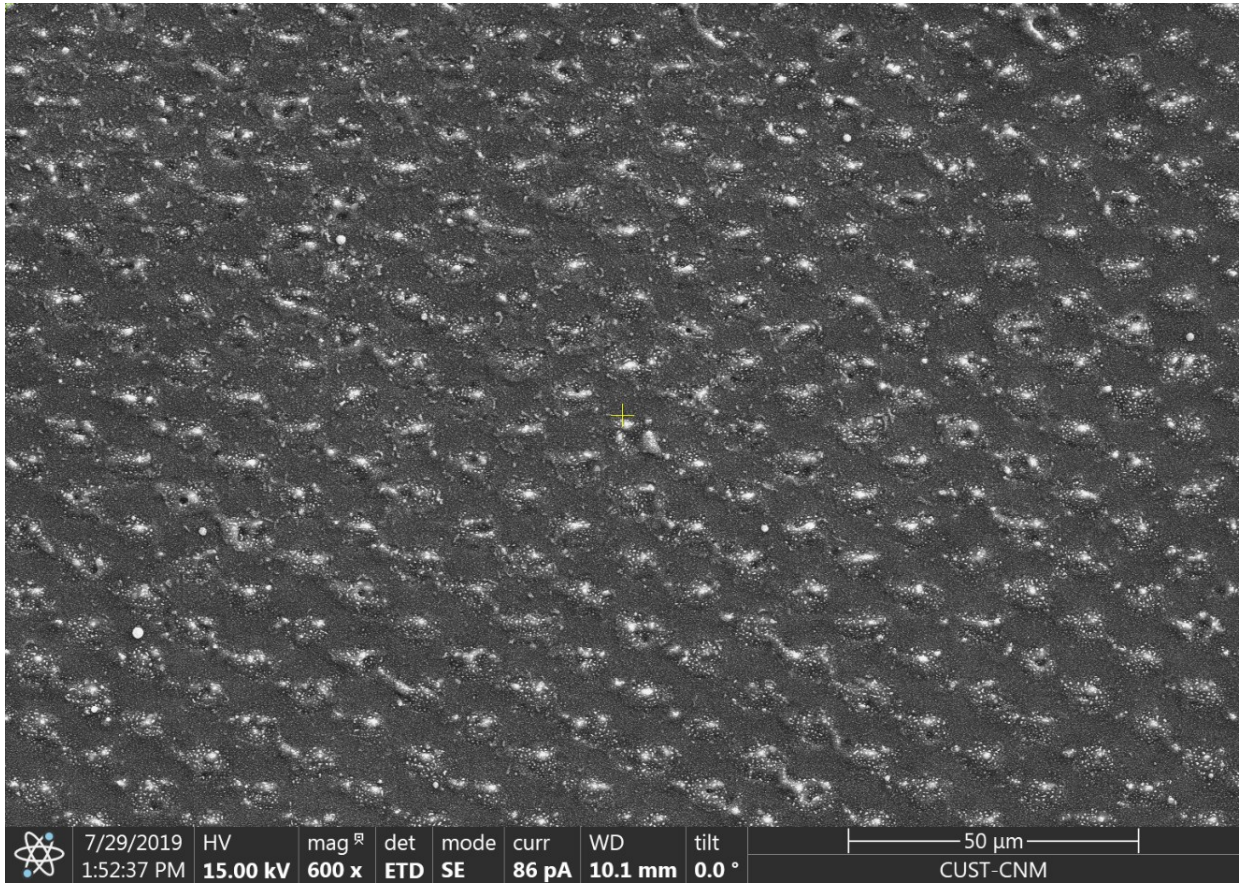

**Figure S1.** Low magnification SEM image of the Ni<sub>50</sub>@Au<sub>50</sub> NPAs corresponding to Figure 1(c).

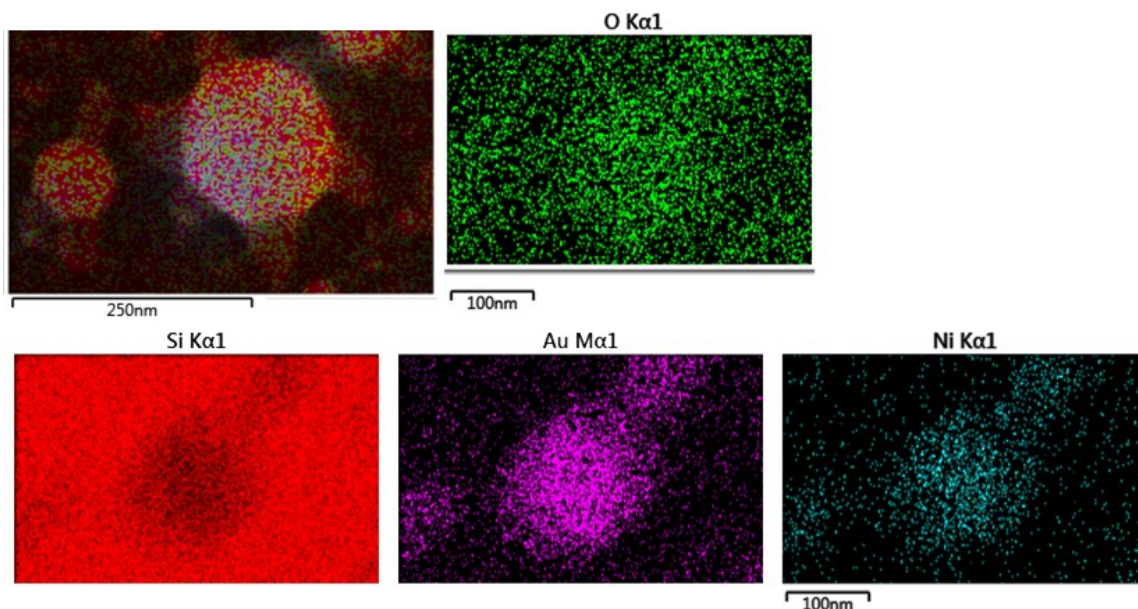

**Figure S2.** Higher magnification EDS mapping of single crystallized particle corresponding to Figure 2(d).

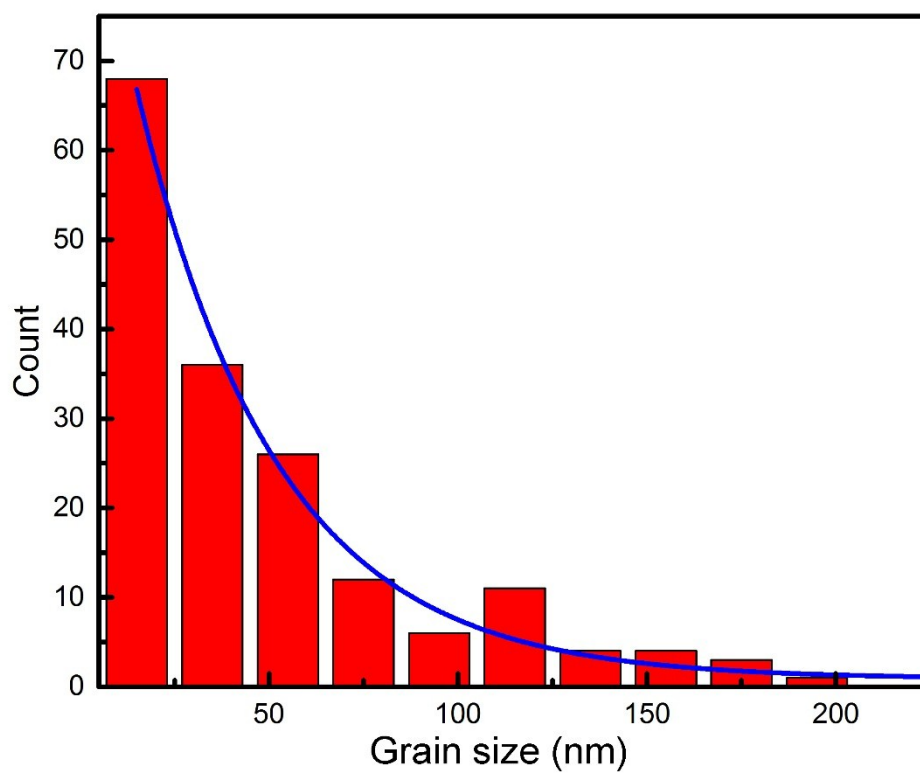

**Figure S3.** Plots of the grainsize distribution of the as-annealed  $\text{Ni}_{50}@Au_{50}$  core-shell particles in the

TEM image of Figure 7(a).

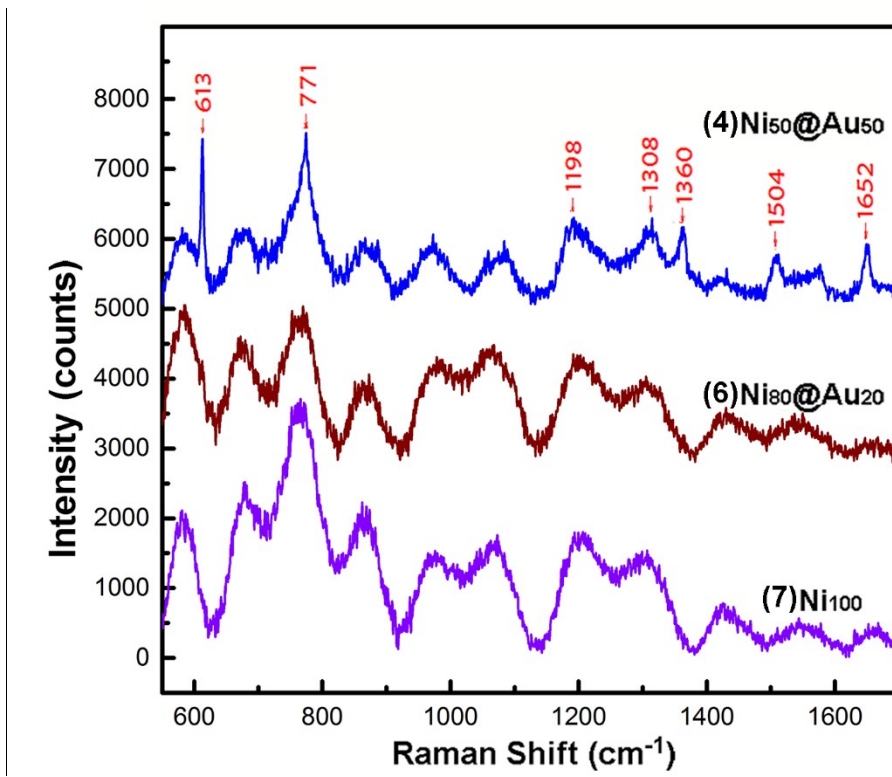

**Figure S4.** SERS spectra of the 10<sup>-6</sup> M R6G molecules adsorbed on the substrates of Ni<sub>100</sub> (7), Ni<sub>80</sub>@Au<sub>20</sub> (6) and Ni<sub>50</sub>@Au<sub>50</sub> (4), respectively.

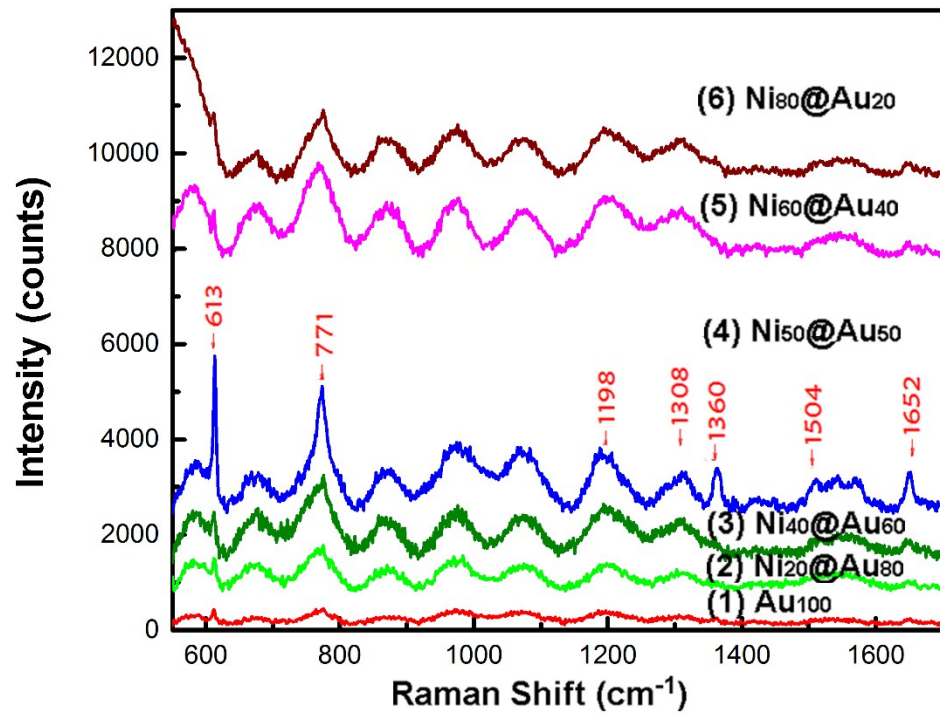

**Figure S5.** SERS spectra of the  $10^{-4}$  M R6G molecules adsorbed on the substrates of Au<sub>100</sub> (1), Ni<sub>20</sub>@Au<sub>80</sub> (2), Ni<sub>40</sub>@Au<sub>60</sub> (3), Ni<sub>50</sub>@Au<sub>50</sub> (4), Ni<sub>60</sub>@Au<sub>40</sub> (5) and Ni<sub>80</sub>@Au<sub>20</sub> (6) NPAs, respectively.
